# Supplementary material for: Synthesis, structure and computational studies of a cationic T-shaped Pd-complex
Source: Royal Society of Chemistry journal article supplement (doi:10.1039/c3nj41145a), 2013-01-01
Supplement: c3nj41145a.pdf [file c3nj41145a.pdf]

*Supporting Information for*

# Synthesis, Structure and Computational Studies on a Cationic T-shaped Pd-Complex

*Marc D. Walter,<sup>\*†</sup> Peter S. White<sup>‡</sup> and Maurice Brookhart<sup>\*‡</sup>*

<sup>†</sup>Institut für Anorganische und Analytische Chemie, Technische Universität Braunschweig,  
Hagenring 30, 38106 Braunschweig, Germany

<sup>‡</sup>Department of Chemistry, University of North Carolina at Chapel Hill, Chapel Hill, NC 27599-  
3290, USA

E-mail: [mwalter@tu-bs.de](mailto:mwalter@tu-bs.de); [brookhart@email.unc.edu](mailto:brookhart@email.unc.edu)

## 1. Computational Details

All computations were performed using the density functional method B97D as implemented in the Gaussian09 program.<sup>[1]</sup> For all main-group elements (C, H, N, O and P) the all-electron triple-z basis set (6-311G\*\*) was used,<sup>[2]</sup> whereas for palladium (Pd) a small-core relativistic ECP together with the corresponding double-z valence basis set was employed (Stuttgart RSC 1997 ECP).<sup>[3]</sup>

**Table S1. Energies of the optimized structures /B97D**

| Compound                                                                                              | E(0 K) <sup>a</sup> | H(298 K) <sup>b</sup> | G(298 K) <sup>b</sup> |
|-------------------------------------------------------------------------------------------------------|---------------------|-----------------------|-----------------------|
|                                                                                                       | [Ha]                | [Ha]                  | [Ha]                  |
| CH <sub>4</sub>                                                                                       | -40.461047          | -40.457229            | -40.478383            |
| H <sup>+</sup>                                                                                        | 0.000000            | 0.002360              | -0.010000             |
| P( <i>t</i> Bu) <sub>3</sub>                                                                          | -814.342356         | -814.323976           | -814.382865           |
| [( <i>t</i> Bu <sub>3</sub> P)Pd(Me)(Cl)]                                                             | -1442.701011        | -1442.676679          | -1442.750044          |
| [( <i>t</i> Bu <sub>3</sub> P) <sub>2</sub> PdMe] <sup>+</sup>                                        | -1796.622087        | -1796.581170          | -1796.686666          |
| [( <i>t</i> Bu <sub>3</sub> P) <sub>2</sub> Pd(CH <sub>4</sub> )] <sup>2+</sup>                       | -1796.859498        | -1796.816810          | -1796.926655          |
| TS: [( <i>t</i> Bu <sub>3</sub> P) <sub>2</sub> Pd(CH <sub>4</sub> )] <sup>2+</sup> - CH <sub>4</sub> | -1796.858488        | -1796.815311          | -1796.926653          |
| [( <i>t</i> Bu <sub>3</sub> P) <sub>2</sub> Pd] <sup>2+</sup>                                         | -1756.400152        | -1756.360153          | -1756.465018          |
| [(PONOP)Pd(CH <sub>4</sub> )] <sup>2+</sup>                                                           | -1878.918951        | -1878.880383          | -1878.984675          |

<sup>a</sup>DFT energy incl. ZPE.

<sup>b</sup>standard conditions T = 298.15 K and p = 1 atm.

**Table S2. Energies of the optimized structures /PBE0**

| Compound                     | E(0 K) <sup>a</sup> | H(298 K) <sup>b</sup> | G(298 K) <sup>b</sup> |
|------------------------------|---------------------|-----------------------|-----------------------|
|                              | [Ha]                | [Ha]                  | [Ha]                  |
| CH <sub>4</sub>              | -40.425737          | -40.421923            | -40.443055            |
| H <sup>+</sup>               | 0.000000            | 0.002360              | -0.010000             |
| P( <i>t</i> Bu) <sub>3</sub> | -813.915506         | -813.896764           | -813.956794           |

|                                                           |              |              |              |
|-----------------------------------------------------------|--------------|--------------|--------------|
| $[(t\text{Bu}_3\text{P})\text{Pd}(\text{Me})(\text{Cl})]$ | -1442.701011 | -1442.676679 | -1442.750044 |
| $[(t\text{Bu}_3\text{P})_2\text{PdMe}]^+$                 | -1796.622087 | -1796.581170 | -1796.686666 |
| $[(t\text{Bu}_3\text{P})_2\text{Pd}(\text{CH}_4)]^{2+}$   | -1796.859498 | -1796.816810 | -1796.926655 |
| $[(t\text{Bu}_3\text{P})_2\text{Pd}]^{2+}$                | -1755.222484 | -1755.182559 | -1755.287212 |
| $[(\text{PONOP})\text{Pd}(\text{CH}_4)]^{2+}$             | -1877.746748 | -1877.708572 | -1877.813035 |

<sup>a</sup>DFT energy incl. ZPE.

<sup>b</sup>standard conditions T = 298.15 K and p = 1 atm.

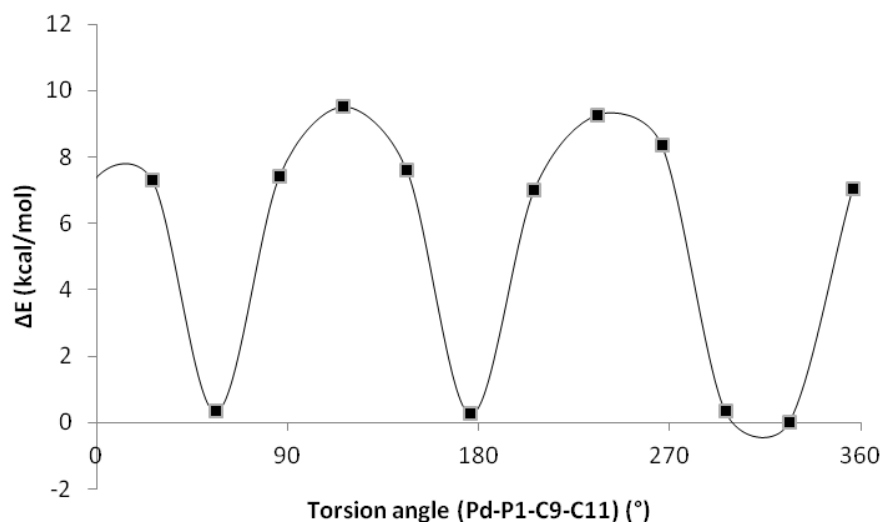

**Figure S1.** Scan along the dihedral angle Pd-P1-C9-C11

## 2. References

- [1] Gaussian 09, Revision A.1, Frisch, M. J.; Trucks, G. W.; Schlegel, H. B.; Scuseria, G. E.; Robb, M. A.; Cheeseman, J. R.; Scalmani, G.; Barone, V.; Mennucci, B.; Petersson, G. A.; Nakatsuji, H.; Caricato, M.; Li, X.; Hratchian, H. P.; Izmaylov, A. F.; Bloino, J.; Zheng, G.; Sonnenberg, J. L.; Hada, M.; Ehara, M.; Toyota, K.; Fukuda, R.; Hasegawa, J.; Ishida, M.; Nakajima, T.; Honda, Y.; Kitao, O.; Nakai, H.; Vreven, T.; Montgomery, Jr., J. A.; Peralta, J. E.; Ogliaro, F.; Bearpark, M.; Heyd, J. J.; Brothers, E.; Kudin, K. N.;

Staroverov, V. N.; Kobayashi, R.; Normand, J.; Raghavachari, K.; Rendell, A.; Burant, J. C.; Iyengar, S. S.; Tomasi, J.; Cossi, M.; Rega, N.; Millam, N. J.; Klene, M.; Knox, J. E.; Cross, J. B.; Bakken, V.; Adamo, C.; Jaramillo, J.; Gomperts, R.; Stratmann, R. E.; Yazyev, O.; Austin, A. J.; Cammi, R.; Pomelli, C.; Ochterski, J. W.; Martin, R. L.; Morokuma, K.; Zakrzewski, V. G.; Voth, G. A.; Salvador, P.; Dannenberg, J. J.; Dapprich, S.; Daniels, A. D.; Farkas, Ö.; Foresman, J. B.; Ortiz, J. V.; Cioslowski, J.; Fox, D. J. Gaussian, Inc., Wallingford CT, **2009**.

[2] X. Cao and M. Dolg, *J. Chem. Phys.*, 2001, **115**, 7348.

[3] (a) A. Bergner, M. Dolg, W. Kuechle, H. Stoll and H. Preuss, *Mol. Phys.*, 1993, **80**, 1431; (b) M. Kaupp, P. v. R. Schleyer, H. Stoll and H. Preuss, *J. Chem. Phys.*, 1991, **94**, 1360; (c) M. Dolg, H. Stoll, H. Preuss and R. M. Pitzer, *J. Phys. Chem.*, 1993, **97**, 5852.
